# Supplementary material for: Potentially repurposable drugs for schizophrenia identified from its interactome
Source: Sci Rep. 2019 Sep 3;9:12682. doi: 10.1038/s41598-019-48307-w (PMC6722087; doi:10.1038/s41598-019-48307-w)
Supplement: Supplementary file 1 — Dataset 1 [file 41598_2019_48307_MOESM1_ESM.xlsx]

## Sheet: Data File 1
Data File 1 – Source datasets of gene expression data: The source datasets for schizophrenia-associated and drug-induced gene expression profiles analyzed in this study are shown in this file
Drug	Bioset 1	Source dataset ID	Bioset 2	Source dataset ID
Acetazolamide	MCF7 cells + acetazolamide, 18uM _vs_ DMSO vehicle	GSE5258, version 2 of the Connectivity Map dataset (CMAP 2.0)	Whole blood from schizophrenic patients _vs_ healthy controls_GPL6947	GSE38485
Alendronate	Heart of rats + ALENDRONIC ACID at 138mg-kg-d in CMC by oral gavage 5d _vs_ vehicle	Chemical Effects in Biological Systems database (CEBS) Study ID 004-00004-0100-000-9: Drug Matrix - In Vivo Rat Heart [Codelink]	Associative striatum tissues from schizophrenia patients _vs_ normals	GSE53987
Alfacalcidol	Liver of rats + ALFACALCIDOL at 043mg-kg-d in CMC by oral gavage 1d _vs_ vehicle	GSE8858, Chemical Effects in Biological Systems database Study ID 004-00004-0100-000-9: Drug Matrix - In Vivo Rat Liver [Codelink]	Prefrontal cortex Brodmann area 46 - schizophrenics with short DOI _vs_ healthy controls	GSE21138
Amiloride	HL60 cells + amiloride, 13.2uM _vs_ DMSO vehicle	GSE5258, version 2 of the Connectivity Map dataset (CMAP 2.0)	Whole blood from schizophrenic patients _vs_ healthy controls_GPL6947	GSE38485
Antazoline	HL60 cells + antazoline, 13.2uM _vs_ DMSO vehicle	GSE5258, version 2 of the Connectivity Map dataset (CMAP 2.0)	Whole blood from schizophrenic patients _vs_ healthy controls_GPL6947	GSE38485
Bepridil	HL60 cells + bepridil, 10uM _vs_ DMSO vehicle	GSE5258, version 2 of the Connectivity Map dataset (CMAP 2.0)	Neural progenitors derived from donor stably expressing GFP - schizophrenia _vs_ normal	GSE80170
Cinnarizine	HL60 cells + cinnarizine, 10.8uM _vs_ DMSO vehicle	GSE5258, version 2 of the Connectivity Map dataset (CMAP 2.0)	Whole blood from schizophrenic patients _vs_ healthy controls_GPL6947	GSE38485
Cromoglicic acid	MCF7 cells + cromoglicic acid, 7.8uM _vs_ DMSO vehicle	GSE5258, version 2 of the Connectivity Map dataset (CMAP 2.0)	Neural progenitors derived from donor stably expressing GFP - schizophrenia _vs_ normal	GSE80170
Danazol	HL60 cells + danazol, 11.8uM _vs_ DMSO vehicle	GSE5258, version 2 of the Connectivity Map dataset (CMAP 2.0)	Whole blood from schizophrenic patients _vs_ healthy controls_GPL6947	GSE38485
Dimenhydrinate	HL60 cells + dimenhydrinate, 8.6uM _vs_ DMSO vehicle	GSE5258, version 2 of the Connectivity Map dataset (CMAP 2.0)	Whole blood from schizophrenic patients _vs_ healthy controls_GPL6947	GSE38485
Miconazole	HL60 cells + miconazole, 9.6uM _vs_ DMSO vehicle	GSE5258, version 2 of the Connectivity Map dataset (CMAP 2.0)	Hippocampus tissues from schizophrenia patients _vs_ normals	GSE53987
Tetracycline	HL60 cells + tetracycline, 8.4uM _vs_ DMSO vehicle	GSE5258, version 2 of the Connectivity Map dataset (CMAP 2.0)	Whole blood from schizophrenic patients _vs_ healthy controls_GPL6947	GSE38485
Amitriptyline	HL60 cells + amitriptyline, 12.8uM _vs_ DMSO vehicle	GSE5258, version 2 of the Connectivity Map dataset (CMAP 2.0)	Hippocampus tissues from schizophrenia patients _vs_ normals	GSE53987
Clozapine	HL60 cells+clozapine, 10 μM vs. DMSO vehicle	GSE5258, version 2 of the Connectivity Map dataset (CMAP 2.0)	Prefrontal cortex Brodmann area 46 of schizophreniacs with short DOI vs. healthy controls	GSE21138
Haloperidol	HL60 cells+haloperidol, 10 μM vs. DMSO vehicle	GSE5258, version 2 of the Connectivity Map dataset (CMAP 2.0)	Prefrontal cortex Brodmann area 46 of schizophreniacs with short DOI vs. healthy controls	GSE21138
Molindone	MCF7+molindone, 12.8 μM vs. DMSO vehicle	GSE5258, version 2 of the Connectivity Map dataset (CMAP 2.0)	Hippocampus tissues from schizophrenia patients _vs_ normals	GSE53987
Nortriptyline	HL60 cells + nortriptyline, 13.4uM _vs_ DMSO vehicle	GSE5258, version 2 of the Connectivity Map dataset (CMAP 2.0)	Hippocampus tissues from schizophrenia patients _vs_ normals	GSE53987
Perphenazine	HL60 cells+perphenazine, 10 μM vs. DMSO vehicle	GSE5258, version 2 of the Connectivity Map dataset (CMAP 2.0)	Prefrontal cortex Brodmann area 46 of schizophreniacs with short DOI vs. healthy controls	GSE21138
